# Supplementary material for: Improving Bacterial Genome Assembly Using a Test of Strand Orientation
Source: bioRxiv or medRxiv preprint supplement (doi:10.1101/2022.07.06.499059), 2022-07-06
Supplement: Supplementary file [file media-1.pdf]

**a** Original Genome ( $bal = 0.45$ )

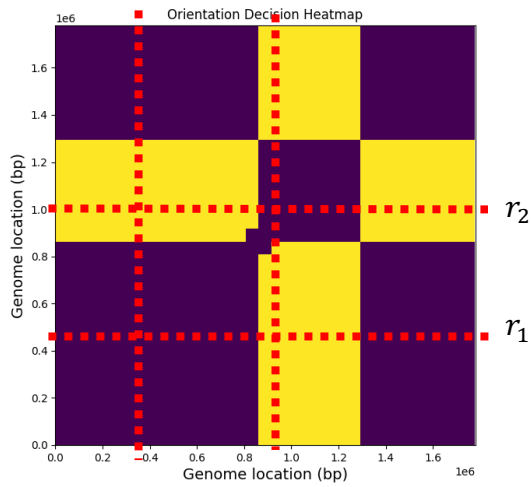

**b** Corrected genome ( $bal = 0.97$ )

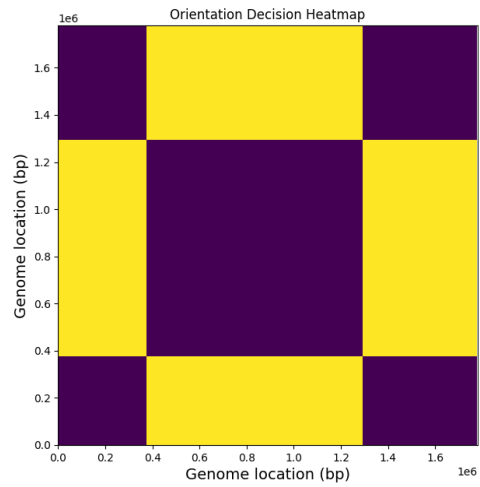

**c** Original Genome vs. SPAdes Contigs

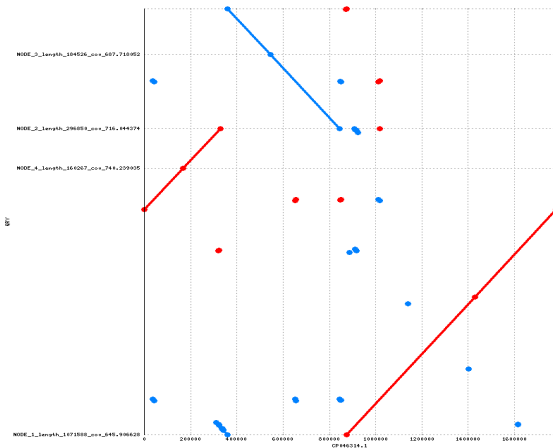

**d** Corrected Genome vs. SPAdes Contigs

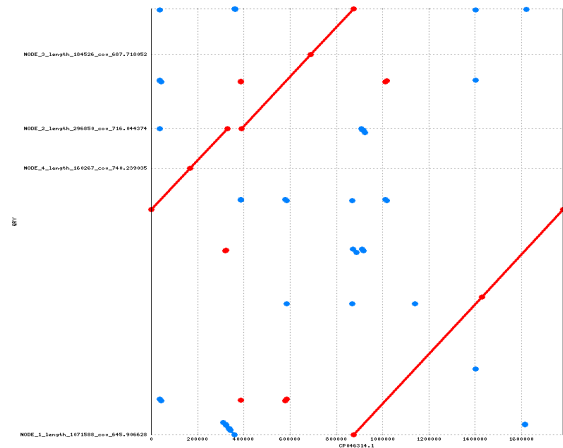

**Supplementary Figure S1.** Correction of Inverted Misassembly of *G. morbillorum* (strain: FDAARGOS\_741; taxID: 29391; assembly accession: GCA\_009730315.1; BioSample: SAMN11056456). **(a)** Orientation heatmap of original genome from GenBank is highly unbalanced. Red dashed lines represent the locations of the repeat ( $r_1, r_2$ ) used to correct the misassembly. **(b)** Heatmap of corrected genome is now balanced. **(c)** Dot plot of original genome against largest four contigs from the re-assembly of the hybrid read data using SPAdes assembler. A large inversion is manually positioned to illustrate the location of the repeat. **(d)** Dot plot of corrected genome against SPAdes re-assembly. The large inversion from (c) is now un-inverted, indicating that the ordering of the contigs chosen in (c,d) is indeed correct.

**a** Original Genome ( $bal = 0.34$ )

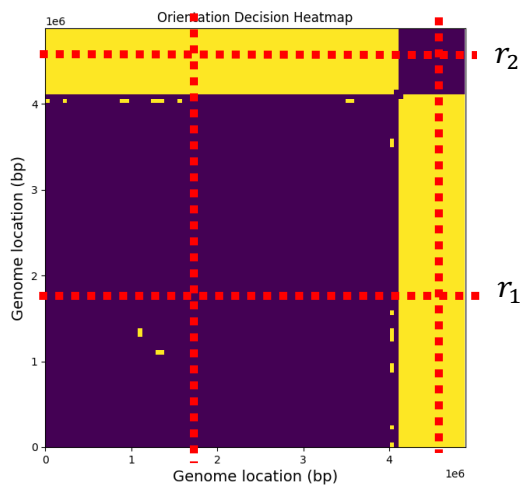

**b** Corrected genome ( $bal = 0.97$ )

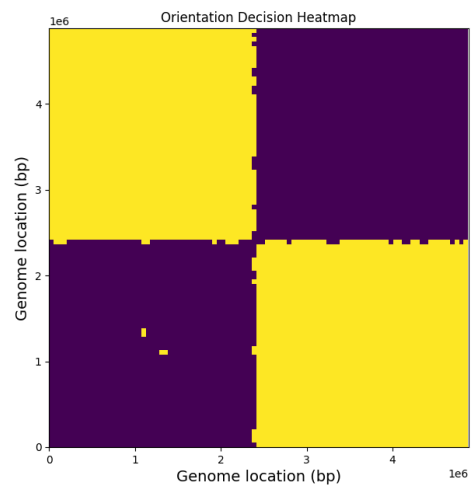

**c** Original Genome vs. SPAdes Contigs

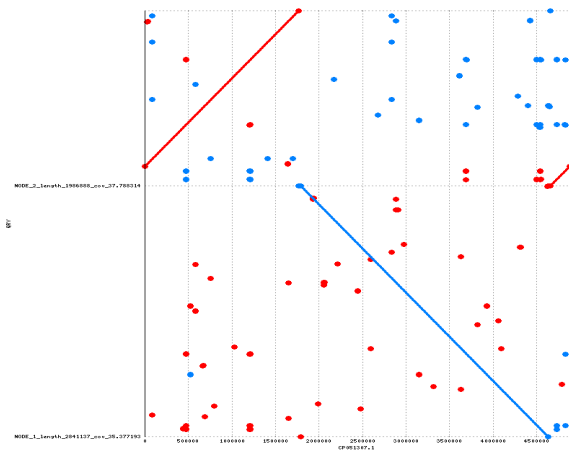

**d** Corrected Genome vs. SPAdes Contigs

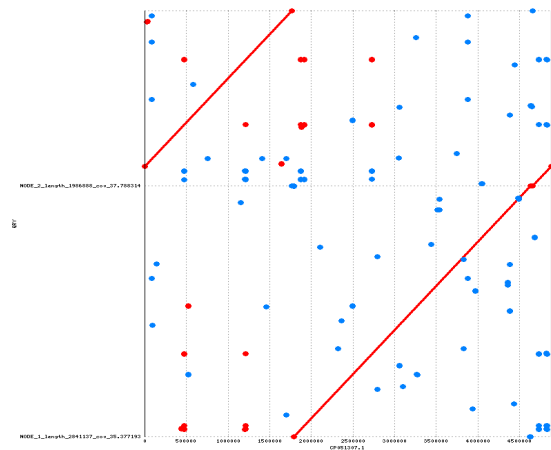

**Supplementary Figure S2.** Correction of Inverted Misassembly of *S. enterica* (strain: CVM 35189; taxID: 28901; assembly accession: **GCA\_016451985.1**; BioSample: SAMN14504941). **(a)** Orientation heatmap of original genome from GenBank is highly unbalanced. Red dashed lines represent the locations of the repeat ( $r_1, r_2$ ) used to correct the misassembly. **(b)** Heatmap of corrected genome is now balanced. **(c)** Dot plot of original genome against largest four contigs from the re-assembly of the hybrid read data using SPAdes assembler. A large inversion is manually positioned to illustrate the location of the repeat. **(d)** Dot plot of corrected genome against SPAdes re-assembly. The large inversion from (c) is now un-inverted, indicating that the ordering of the contigs chosen in (c,d) is indeed correct.

**a** Traversal 1 ( $bal = 0.68$ )

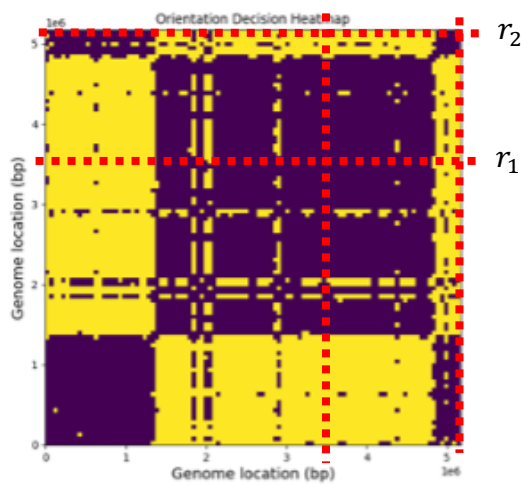

**b** Traversal 2 ( $bal = 0.99$ )

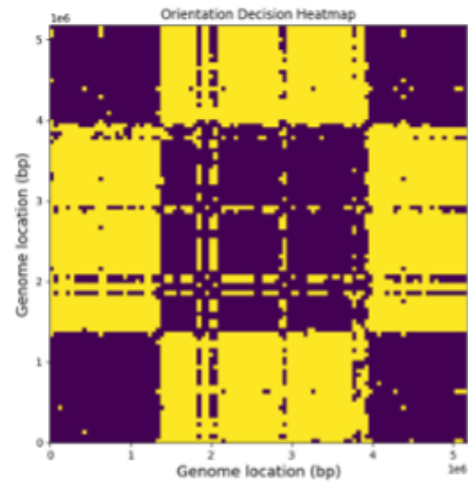

**c** NCTC Genome vs. Traversal 1

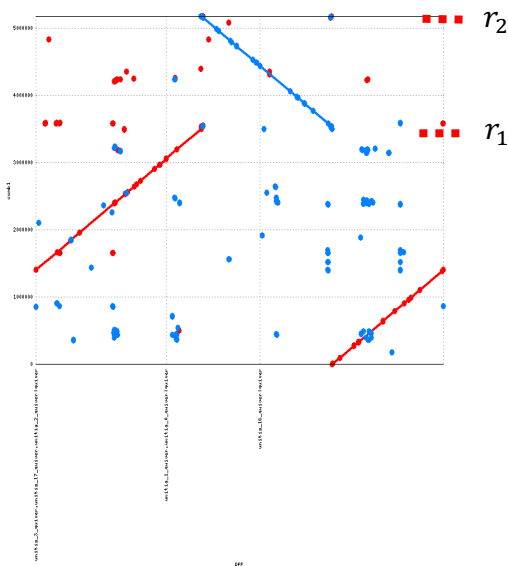

**d** NCTC Genome vs. Traversal 2

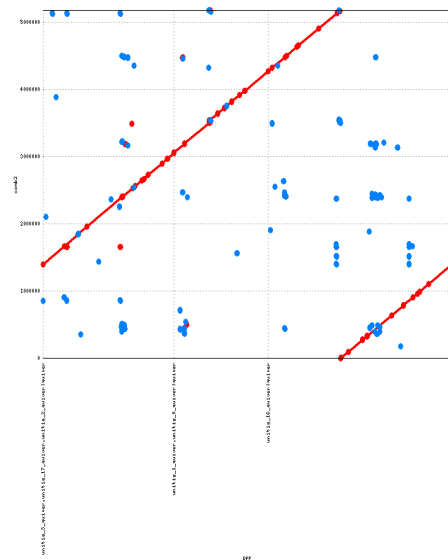

**Supplementary Figure S3.** Assembly analysis of *E. coli* (strain: NCTC9006; taxID: 562; BioSample: SAMEA3376915). The long read data from NCTC 3000 was assembled using the HINGE assembler, resulting in an assembly graph with two possible traversals. **(a)** Orientation heatmap of Traversal 1 is unbalanced. Red dashed lines represent the locations of the repeat ( $r_1, r_2$ ) which causes the incomplete assembly. **(b)** Heatmap of Traversal 2 is balanced, suggesting that it is the correct assembly of the genome **(c)** Dot plot of the NCTC genome (containing three contigs) against Traversal 1. A large inversion is present exactly between ( $r_1, r_2$ ). **(d)** Dot plot of NCTC genome against Traversal 2. The large inversion from (c) is now un-inverted, indicating that the ordering of the contigs chosen in (c,d) is indeed correct.

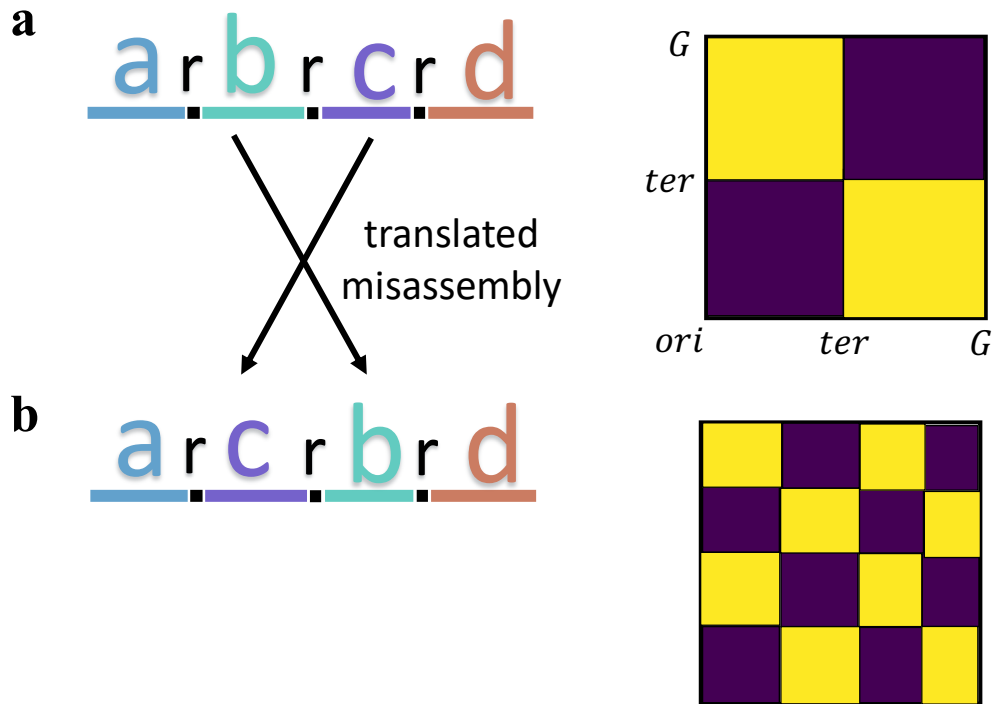

**Supplementary Figure S4. (a)** Example of a genome with a triple repeat on the forward strand, along with the corresponding orientation heatmap. **(b)** Depiction of the same genome if an erroneous translation occurred during assembly by switching the locations of segments *b* and *c*. The corresponding orientation heatmap has three distinct transitions in orientation.

| assembly_accesion | read_type | sequencer(s)                          | assembler | misassembly_supported | notes                                                                   |
|-------------------|-----------|---------------------------------------|-----------|-----------------------|-------------------------------------------------------------------------|
| GCA_005886035.1   | hybrid    | Illumina HiSeq 4000,<br>PacBio Sequel | SPAdes    | yes                   | Re-assembly agrees with corrected genome                                |
| GCA_008065435.1   | long      | PacBio RS II                          | HINGE     | yes                   | Two traversals corresponding to original and corrected genome           |
| GCA_009730315.1   | hybrid    | Illumina HiSeq 4000,<br>PacBio RS     | SPAdes    | yes                   | Two orderings of contigs corresponding to original and corrected genome |
| GCA_016451985.1   | hybrid    | Illumina MiSeq,<br>PacBio Sequel      | SPAdes    | yes                   | Two ordering of contigs corresponding to original and corrected genome  |
| GCA_002012025.1   | short     | Illumina MiSeq                        | SPAdes    | n/a                   | Fragmented re-assembly. Possible read data omitted.                     |
| GCA_016452025.1   | long      | PacBio Sequel                         | HINGE     | n/a                   | Fragmented re-assembly. Possible read data omitted.                     |
| GCA_014623225.1   | long      | PacBio RS II                          | n/a       | n/a                   | Manually discarded due to poor heatmap quality                          |
| GCA_900327275.1   | long      | PacBio RS                             | n/a       | n/a                   | Manually discarded due to poor heatmap quality                          |
| GCA_003112145.1   | short     | Illumina MiSeq                        | n/a       | n/a                   | Some read data omitted. Re-assembly not possible                        |
| GCA_003339775.1   | long      | PacBio RS                             | n/a       | n/a                   | Some read data omitted. Re-assembly not possible                        |
| GCA_000198515.1   | none      |                                       |           |                       |                                                                         |
| GCA_000487155.2   | none      |                                       |           |                       |                                                                         |
| GCA_001562215.1   | none      |                                       |           |                       |                                                                         |
| GCA_001722005.2   | none      |                                       |           |                       |                                                                         |
| GCA_001723625.1   | none      |                                       |           |                       |                                                                         |

|                 |      |  |  |  |  |
|-----------------|------|--|--|--|--|
| GCA_001936395.1 | none |  |  |  |  |
| GCA_001938665.1 | none |  |  |  |  |
| GCA_002005165.1 | none |  |  |  |  |
| GCA_002441975.1 | none |  |  |  |  |
| GCA_004291075.1 | none |  |  |  |  |
| GCA_009950475.1 | none |  |  |  |  |
| GCA_009951245.1 | none |  |  |  |  |
| GCA_011045215.1 | none |  |  |  |  |
| GCA_011801475.1 | none |  |  |  |  |
| GCA_012934815.1 | none |  |  |  |  |
| GCA_013085185.1 | none |  |  |  |  |
| GCA_013305705.1 | none |  |  |  |  |
| GCA_014168635.1 | none |  |  |  |  |
| GCA_014489455.1 | none |  |  |  |  |
| GCA_014731795.1 | none |  |  |  |  |
| GCA_900324235.1 | none |  |  |  |  |
| GCA_900327275.1 | none |  |  |  |  |

**Supplementary Table T1.** List of misassemblies detected from 5,000 randomly chosen GenBank genomes.
